# Supplementary material for: Quantitative 1H Nuclear Magnetic Resonance Method for Assessing the Purity of Dipotassium Glycyrrhizinate
Source: MDPI journal article supplement (doi:10.3390/molecules26123549), 2021-06-10
Supplement: s1 [file s1]

## Supporting information

# Quantitative $^1\text{H}$ Nuclear Magnetic Resonance Method for Assessing the Purity of Dipotassium Glycyrrhizinate

Yuanyuan Zhang<sup>#</sup>, Jie Zhang<sup>#</sup>, Wenxuan Zhang, Yue Wang, Yinghong Wang, Qingyun Yang<sup>\*</sup>,  
Song Wu<sup>\*</sup>

State Key Laboratory of Bioactive Substance and Function of Natural Medicines, Institute of  
Materia Medica, Chinese Academy of Medical Sciences & Peking Union Medical College,  
Beijing 100050, China

### Table of Contents

|                                                                                                             |    |
|-------------------------------------------------------------------------------------------------------------|----|
| 1. Figure S1. $T_1$ relaxation times of KG, FA and KHP.....                                                 | S1 |
| 2. Figure S2. $^1\text{H}$ -NMR spectrum (500 MHz, $\text{D}_2\text{O}$ ) of KG .....                       | S1 |
| 3. Figure S3. $^1\text{H}$ -NMR spectrum (500 MHz, $\text{D}_2\text{O}$ ) of FA.....                        | S2 |
| 4. Figure S4. $^1\text{H}$ -NMR spectrum (500 MHz, $\text{D}_2\text{O}$ ) of KHP.....                       | S2 |
| 5. Figure S5. $^1\text{H}$ -NMR spectrum (500 MHz, $\text{D}_2\text{O}$ ) of mixture of FA, KHP and KG..... | S3 |
| 6. Figure S6. HPLC chromatogram of ammonium glycyrrhizinate reference substance.....                        | S3 |
| 7. Figure S7. HPLC chromatogram of KG sample (batch no. 8060633) .....                                      | S4 |
| 8. Figure S8. Calibration curve of K by ICP-OES.....                                                        | S4 |
| 9. Table S1. The integral areas of the internal standards (KHP and FA) and KG at different D1..             | S5 |
| 10. Table S2. Information on ICP-OES operating conditions.....                                              | S5 |

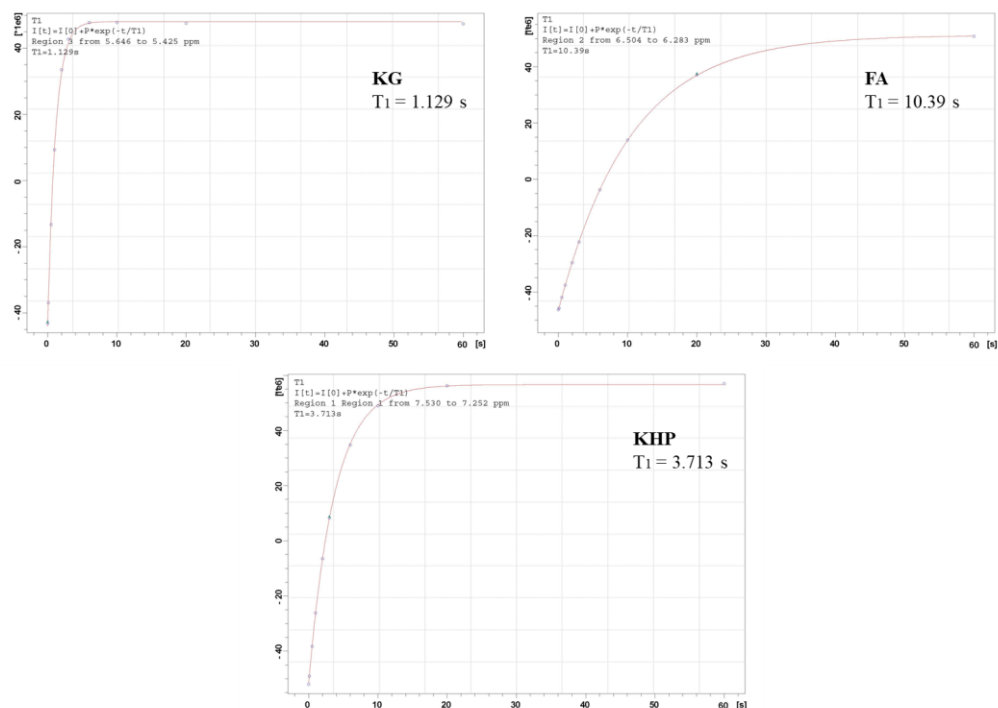

**Figure S1.**  $T_1$  relaxation times of KG, FA and KHP.

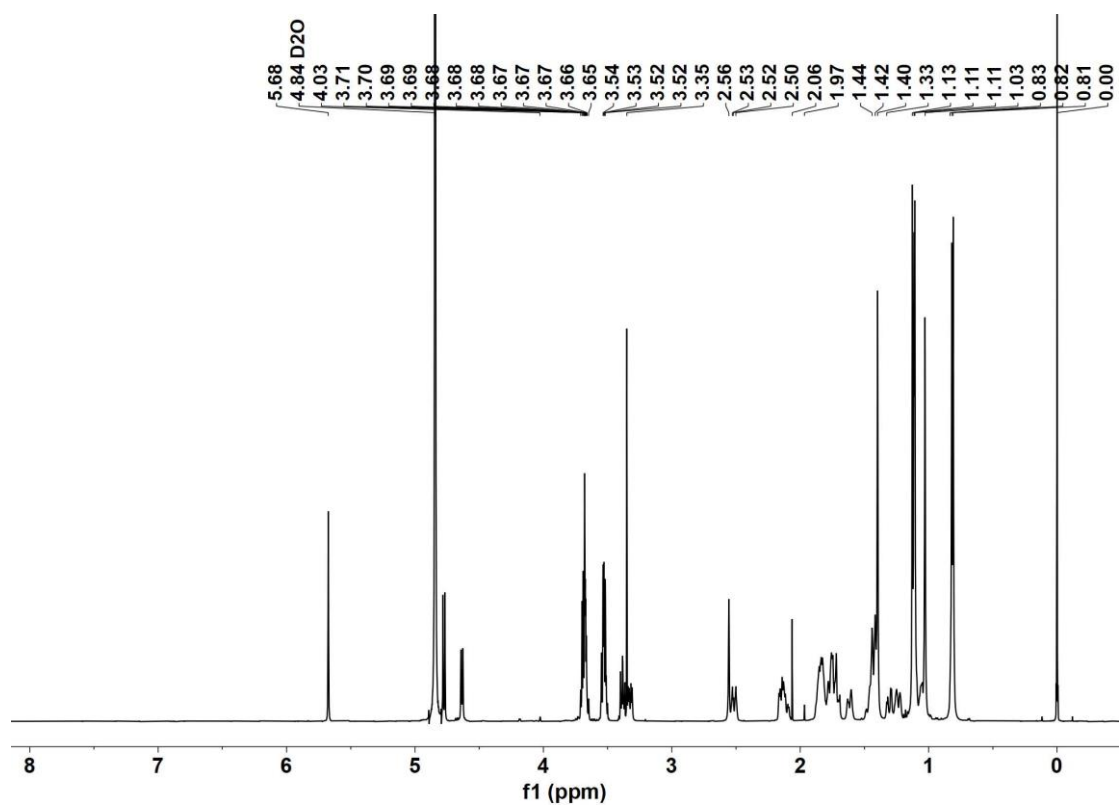

**Figure S2.**  $^1\text{H}$ -NMR spectrum (500 MHz,  $\text{D}_2\text{O}$ ) of KG

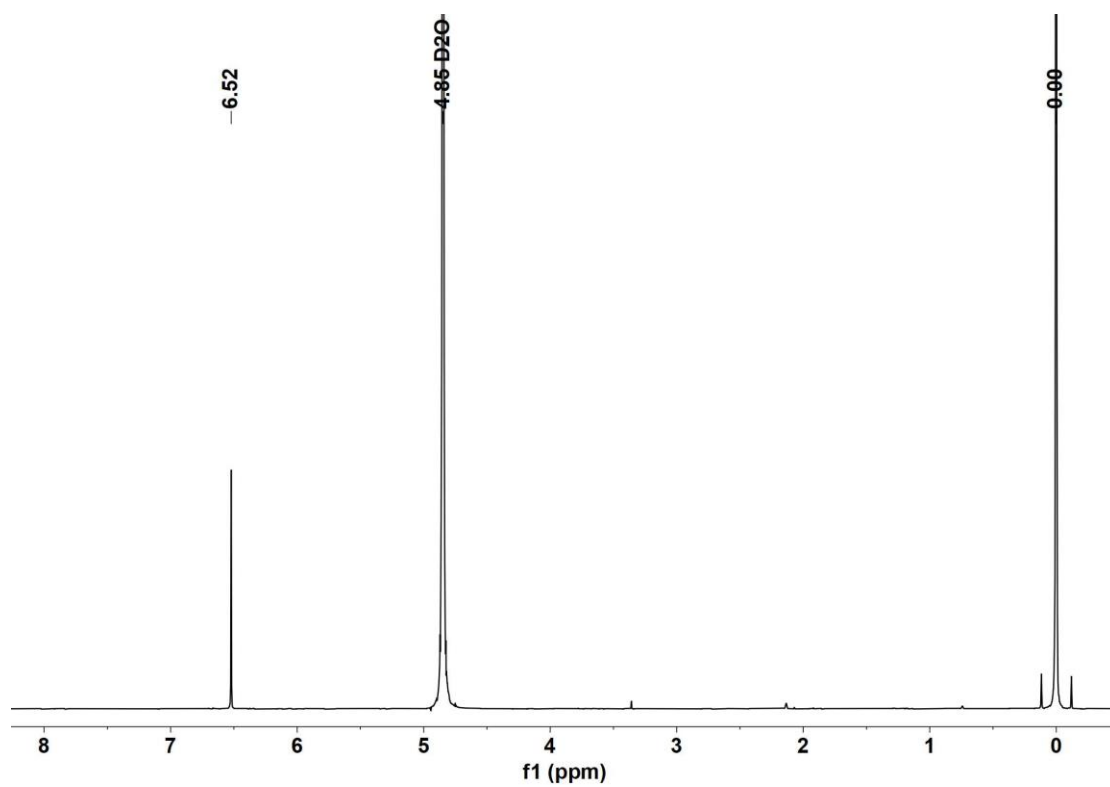

**Figure S3.**  $^1\text{H}$ -NMR spectrum (500 MHz,  $\text{D}_2\text{O}$ ) of FA

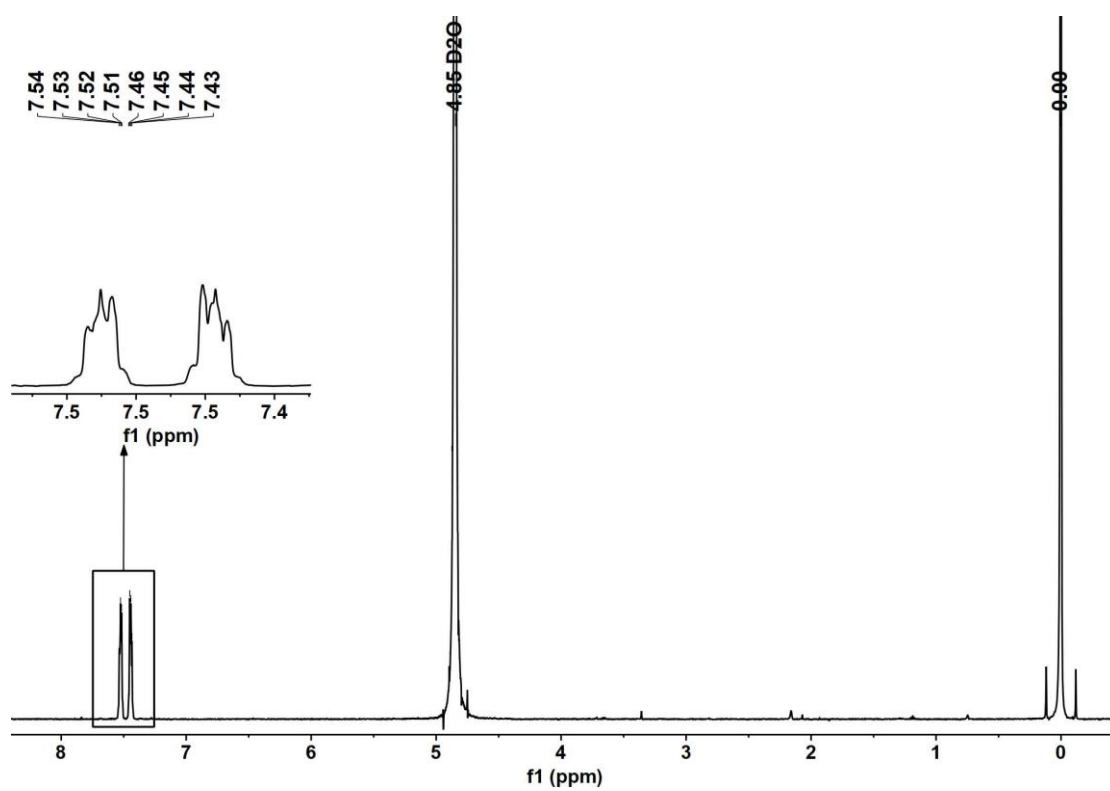

**Figure S4.**  $^1\text{H}$ -NMR spectrum (500 MHz,  $\text{D}_2\text{O}$ ) of KHP

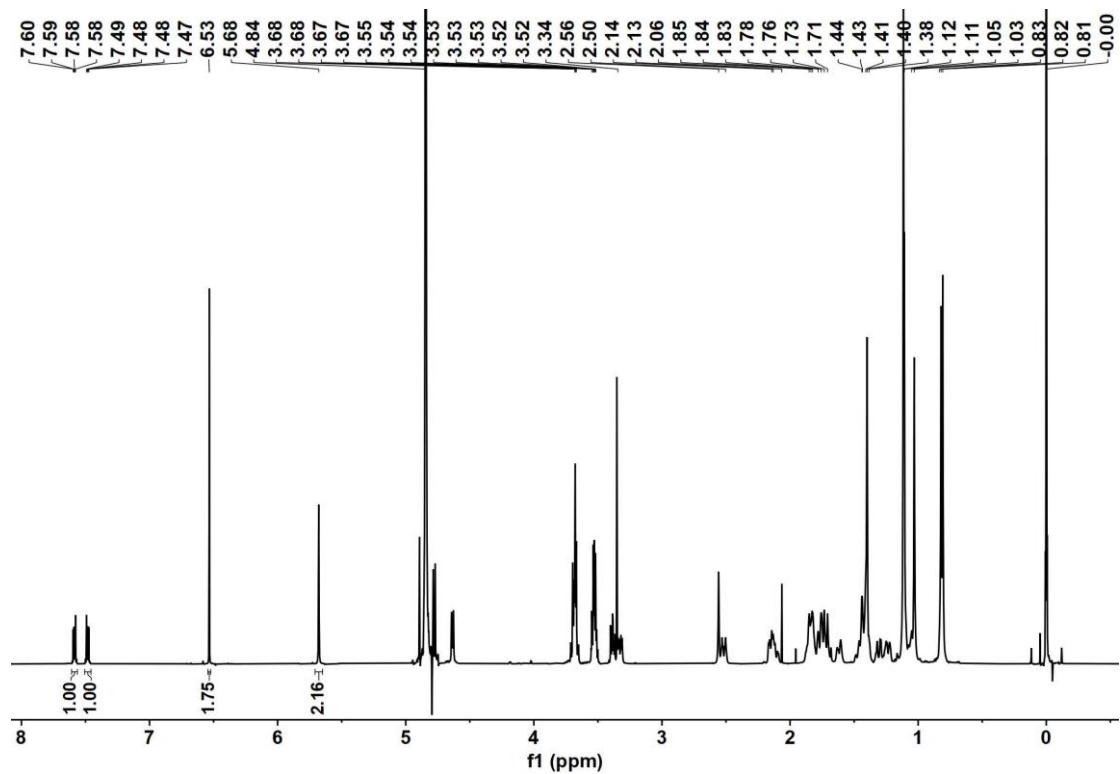

**Figure S5.**  $^1\text{H}$ -NMR spectrum of the mixture of FA, KHP and KG in  $\text{D}_2\text{O}$  (500 MHz).

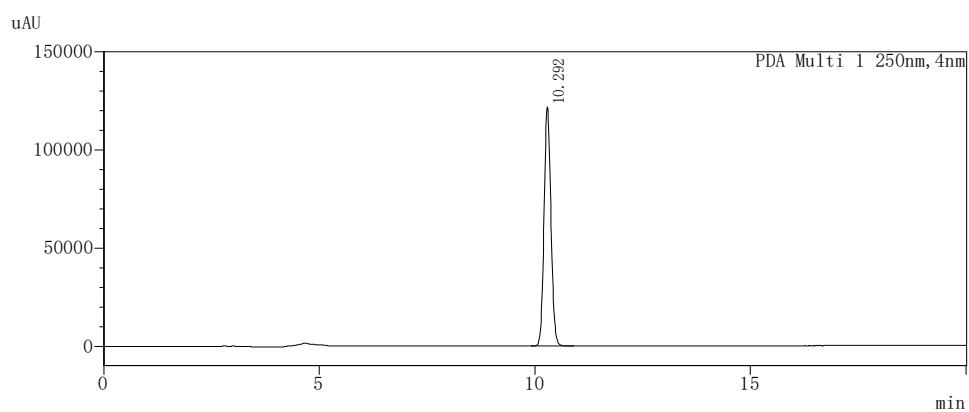

**Figure S6.** HPLC chromatogram of ammonium glycyrrhizinate reference substance

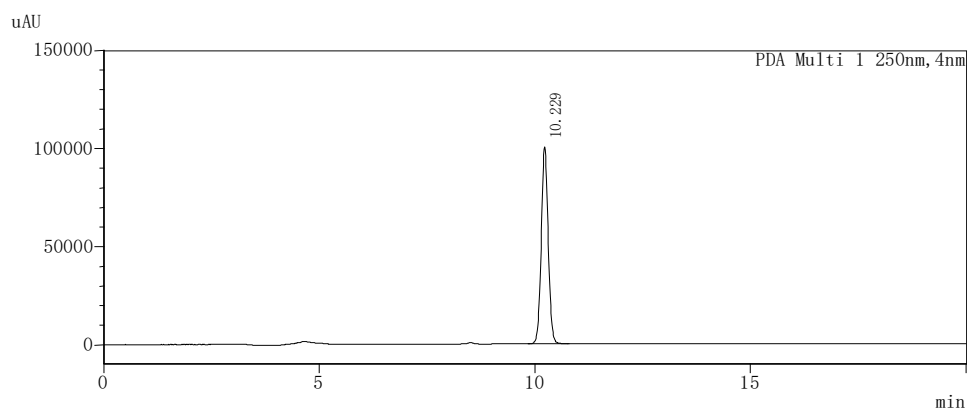

**Figure S7.** HPLC chromatogram of KG sample (batch no. 8060633)

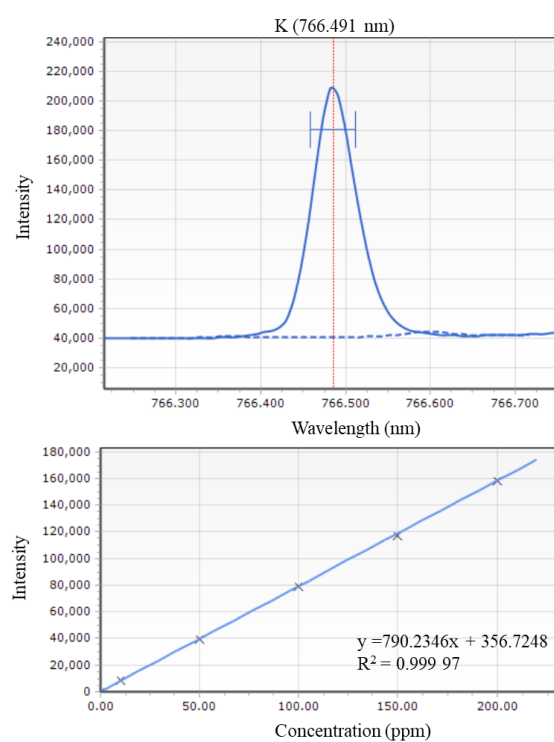

**Figure S8.** Calibration curve of K by ICP-OES.

**Table S1.** The integral areas of the internal standards (KHP and FA) and KG at different D1.

| D1(s) | $A_{\text{KHP}}$ | $A_{\text{FA}}$ | $A_{\text{KG}}$ |
|-------|------------------|-----------------|-----------------|
| 1     | 2.02             | 1.69            | 1.76            |
| 2     | 2.02             | 1.68            | 1.69            |
| 4     | 2.00             | 1.68            | 1.68            |
| 8     | 2.01             | 1.75            | 1.71            |
| 16    | 2.00             | 1.77            | 1.71            |
| 32    | 2.00             | 1.79            | 1.70            |
| 48    | 2.01             | 1.79            | 1.70            |
| 64    | 2.00             | 1.79            | 1.70            |
| 70    | 2.01             | 1.79            | 1.70            |

**Table S2.** Information on ICP-OES operating conditions.

| Parameter             | Value                              |
|-----------------------|------------------------------------|
| Plasma gas flow       | 12.0 L/min                         |
| Auxiliary gas flow    | 1.0 L/min                          |
| Nebulizer gas flow    | 0.7 L/min                          |
| RF power              | 1200 watts                         |
| Plasma view           | radial                             |
| Read delay            | 12 sec                             |
| Peristaltic pump flow | 12 rpm                             |
| Spray chamber type    | Cyclonic double-pass spray chamber |
| Nebulizer             | Sea spray                          |
| Torch                 | Quartz                             |
| Wavelengths(nm)       | 766.491nm                          |
| Number of replicates  | 3                                  |
| Observation height    | 8mm                                |
